# Supplementary material for: Neural Oscillatory and Network Signatures of Age-Related Cognitive Decline Under Motor-Cognitive Dual-Task Conditions
Source: Research Square preprint supplement (doi:10.21203/rs.3.rs-8470559/v1), 2026-01-13
Supplement: Supplementary file 1 [file 0b43c77374edd70628b1bd2d.docx]

**eTable 2: Demographic characteristics of the older adult group and the younger adult group.**

|  | **Group O** | **Group Y** | ***U* or *t*** | ***p*** |
| --- | --- | --- | --- | --- |
| Gender (male/female) | 9/9 | 10/9 | ***U***=175.000 | 0.875 |
| Age (years) | 66.7226.086 | 23.1051.729 | ***t***= -30.010 | <0.001 |
| Years of Education (years) | 10.1113.660 | 16.4741.349 | ***U***=175.000 | <0.001 |
| Height (cm) | 169.4607.601 | 170.4609.324 | ***t***= 0.300 | 0.767 |
| BMI (kg/m2) | 24.6084.185 | 23.7693.277 | ***t***= -0.297 | 0.769 |
| SMI (kg/m2) | 7.3500.578 | 6.9240.789 | ***t***= -1.866 | 0.070 |
| VFA (cm2) | 98.53342.518 | 83.64236.440 | ***t***= -1.146 | 0.260 |
| P_LM (Nm) | 109.78124.070 | 126.75346.731 | ***t***= 1.377 | 0.177 |

P_LM: Peak torque of lower extremity extensor muscles.
