# Supplementary material for: Neural Oscillatory and Network Signatures of Age-Related Cognitive Decline Under Motor-Cognitive Dual-Task Conditions
Source: Research Square preprint supplement (doi:10.21203/rs.3.rs-8470559/v1), 2026-01-13
Supplement: Supplementary file 1 [file f489cbaa30e6542c985cd68e.pdf]

**eFigure 1: Correspondence between electrodes and brain regions.**

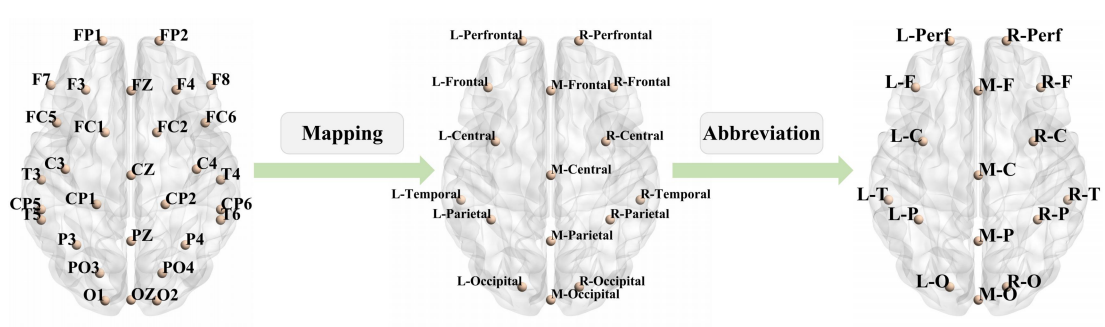

eFigure 1 Correspondence between electrodes and brain regions. The three brain topology plots (left to right) illustrate: (1) original electrode positions, (2) parcellated anatomical regions following atlas-based classification, and (3) abbreviated region labels.
