# Supplementary material for: Neural Oscillatory and Network Signatures of Age-Related Cognitive Decline Under Motor-Cognitive Dual-Task Conditions
Source: Research Square preprint supplement (doi:10.21203/rs.3.rs-8470559/v1), 2026-01-13
Supplement: Supplementary file 2 [file 64604b925d3caf698e87e7dc.docx]

**eTable 3: Statistical results of Power Spectral Density (PSD).**

| **Group** | **Band** | **Electrode** | ***W* or *t*** | ***p*** | ***p*(fdr)** | ***d* or** | ***Power*** |
| --- | --- | --- | --- | --- | --- | --- | --- |
| O | Gamma | PO4 | *W*=179 | <0.001 | 0.030 | =0.936 | 90.0% |
|  |  | T6 | *W*=179 | <0.001 | 0.030 | =0.935 | 90.0% |
|  |  |  |  |  |  |  |  |
| Y | Delta | PZ | *W*=190 | <0.001 | 0.015 | >0.999 | 96.9% |
|  |  | T6 | *W*=190 | <0.001 | 0.015 | >0.999 | 96.9% |
|  |  |  |  |  |  |  |  |
|  | Theta | C4 | *t*=2.857 | 0.005 | 0.021 | *d*=0.655 | 77.1% |
|  |  |  |  |  |  |  |  |
|  | Alpha | FZ | *W*=169 | 0.003 | 0.025 | =0.889 | 84.6% |
|  |  | F3 | *W*=159 | 0.010 | 0.027 | =0.867 | 73.1% |
|  |  | FC1 | *W*=171 | 0.002 | 0.012 | =0.900 | 86.4% |
|  |  | FC2 | *W*=190 | <0.001 | 0.003 | >0.999 | 96.9% |
|  |  | FC5 | *W*=162 | 0.007 | 0.047 | =0.853 | 76.9% |
|  |  | CZ | *W*=164 | 0.005 | 0.026 | =0.863 | 79.3% |
|  |  | C3 | *W*=184 | <0.001 | 0.005 | =0.968 | 94.8% |
|  |  | C4 | *W*=164 | 0.005 | 0.003 | =0.863 | 79.3% |
|  |  | T3 | *W*=165 | 0.005 | 0.027 | =0.868 | 80.4% |
|  |  | T4 | *W*=152 | 0.022 | 0.047 | =0.800 | 63.1% |
|  |  | CP5 | *W*=179 | <0.001 | 0.008 | =0.942 | 92.2% |
|  |  | CP6 | *t*=2.094 | 0.025 | 0.047 | *d*=0.421 | 41.1% |
|  |  | T5 | *W*=162 | <0.001 | 0.036 | =0.853 | 76.9% |
|  |  | PO4 | *W*=148 | 0.033 | 0.038 | =0.779 | 56.8% |
|  |  |  |  |  |  |  |  |
|  | Beta | FC2 | *W*=177 | <0.001 | 0.045 | =0.932 | 91.0% |
|  |  | T5 | *W*=173 | 0.002 | 0.045 | =0.911 | 88.1% |

*p*(fdr): FDR-corrected *p* value.

*d*: **Cohen’s *d*.**

: Estimated effect size in nonparametric power analysis.
