# Supplementary material for: Neural Oscillatory and Network Signatures of Age-Related Cognitive Decline Under Motor-Cognitive Dual-Task Conditions
Source: Research Square preprint supplement (doi:10.21203/rs.3.rs-8470559/v1), 2026-01-13
Supplement: Supplementary file 3 [file 927f59c7ac9f670fdcffd24d.docx]

**eTable 4: Statistical results of nodal degree centrality (Dc).**

| **Group** | **Band** | **Region** | ***W* or *t*** | ***p*** | ***p*(fdr)** | ***d* or** | ***Power*** |
| --- | --- | --- | --- | --- | --- | --- | --- |
| O | Theta | L-T | *t*=2.513 | 0.023 | 0.049 | *d*=0.592 | 65.9% |
|  |  |  |  |  |  |  |  |
|  | Beta | M-C | *t*=3.026 | 0.008 | 0.029 | *d*=0.713 | 81.4% |
|  |  |  |  |  |  |  |  |
| Y | Delta | R-F | *t*=-2.884 | 0.011 | 0.025 | *d*=0.662 | 77.9% |
|  |  | L-O | *t*=-2.793 | 0.018 | 0.043 | *d*=0.641 | 75.2% |
|  |  |  |  |  |  |  |  |
|  | Alpha | R-C | *t*=3.583 | 0.002 | 0.013 | *d*=0.822 | 92.3% |
|  |  | M-C | *t*=2.658 | 0.021 | 0.047 | *d*=0.610 | 71.0% |
|  |  | L-T | *t*=3.588 | 0.002 | 0.011 | *d*=0.823 | 92.4% |
|  |  |  |  |  |  |  |  |
|  | Beta | L-F | *t*=-2.799 | 0.012 | 0.027 | *d*=0.642 | 75.4% |
|  |  |  |  |  |  |  |  |
|  | Gamma | L-C | *t*=2.713 | 0.018 | 0.045 | *d*=0.622 | 72.8% |

*p*(fdr): FDR-corrected *p* value.

*d*: **Cohen’s *d*.**

: Estimated effect size in nonparametric power analysis.
