# Supplementary material for: Neural Oscillatory and Network Signatures of Age-Related Cognitive Decline Under Motor-Cognitive Dual-Task Conditions
Source: Research Square preprint supplement (doi:10.21203/rs.3.rs-8470559/v1), 2026-01-13
Supplement: Supplementary file 4 [file d6821f38c003b8a9a59d6e1a.docx]

**eTable 5: Statistical results of nodal degree centrality (Bc).**

| **Group** | **Band** | **Region** | ***W* or *t*** | ***p*** | ***p*(fdr)** | ***d* or** | ***Power*** |
| --- | --- | --- | --- | --- | --- | --- | --- |
| O | Delta | L-C | *t*=2.981 | 0.009 | 0.025 | *d*=0.703 | 80.2% |
|  |  |  |  |  |  |  |  |
|  | Theta | L-T | *W*=161 | 0.018 | 0.041 | =0.942 | 90.8% |
|  |  |  |  |  |  |  |  |
| Y | Delta | L-F | *t*=2.723 | 0.015 | 0.031 | *d*=0.625 | 73.1% |
|  |  | L-O | *W*=171 | 0.002 | 0.012 | >0.999 | 96.1% |
|  |  |  |  |  |  |  |  |
|  | Alpha | L-PF | *W*=158 | 0.013 | 0.028 | =0.924 | 88.4% |
|  |  |  |  |  |  |  |  |
|  | Beta | L-F | *t*=-3.061 | 0.007 | 0.035 | *d*=0.702 | 82.5% |

*p*(fdr): FDR-corrected *p* value.

*d*: **Cohen’s *d*.**

: Estimated effect size in nonparametric power analysis.
