# Supplementary material for: Neural Oscillatory and Network Signatures of Age-Related Cognitive Decline Under Motor-Cognitive Dual-Task Conditions
Source: Research Square preprint supplement (doi:10.21203/rs.3.rs-8470559/v1), 2026-01-13
Supplement: Supplementary file 5 [file e1dd32a8fffda1d9da6c4680.docx]

**eTable 1: Detailed brain region-to-electrode correspondences.**

| **Region** | **The corresponding electrode** |
| --- | --- |
| Left Prefrontal | FP1 |
| Right Prefrontal | FP2 |
| Left Frontal | F3,F7 |
| Right Frontal | F4,F8 |
| Midline Frontal | FZ |
| Left Central | C3,FC1,FC5 |
| Right Central | C4,FC2,FC6 |
| Midline Central | CZ |
| Left Temporal | T3,T5 |
| Right Temporal | T4,T6 |
| Left Parietal | P3,CP1,CP5 |
| Right Parietal | P4,CP2,CP6 |
| Midline Parietal | PZ |
| Left Occipital | O1,PO3 |
| Right Occipital | O2,PO4 |
| Midline Occipital | OZ |
